# Supplementary material for: Comparison of Errors Produced by ABA and ITC Methods for the Estimation of Forest Inventory Attributes at Stand and Tree Level in Pinus radiata Plantations in Chile
Source: MDPI journal article supplement (doi:10.3390/rs15061544), 2023-03-11
Supplement: s1 [file s1]

**Table S3. Lidar Metrics**

| LiDAR metric                                    | Acronym    |
|-------------------------------------------------|------------|
| Mean                                            | Elev. Mean |
| Variance                                        | Elev.Var   |
| Standard deviation                              | Elev. Sd   |
| Coefficient of variation                        | Elev. Cv   |
| Mode                                            | Elev. Mo   |
| Maximum                                         | Elev. Max  |
| 10th percentile                                 | Elev.P10   |
| 20th percentile                                 | Elev.P20   |
| 25th percentile                                 | Elev.P25   |
| 30th percentile                                 | Elev.P30   |
| 40th percentile                                 | Elev.P40   |
| 50th percentile                                 | Elev.P50   |
| 60th percentile                                 | Elev.P60   |
| 70th percentile                                 | Elev.P70   |
| 75th percentile                                 | Elev.P75   |
| 80th percentile                                 | Elev.P80   |
| 85th percentile                                 | Elev.P85   |
| 90th percentile                                 | Elev.P90   |
| 95th percentile                                 | Elev.P95   |
| 99th percentile                                 | Elev.P99   |
| Height kurtosis                                 | Elev. Kur  |
| Height skewness                                 | Elev. Ske  |
| Elev.SQRT.mean.SQ                               | Elev.SQM   |
| (All returns above height break) / (Total first | ARA2/TFR   |
| Percentage first returns above mode             | PFRAMO     |
| Percentage first returns above mean             | PFRAM      |
| All returns above height break                  | ARA2       |
| All returns above mode                          | ARAMO      |
| Canopy relief ratio                             | CRR        |
| Canopy Cover (Percentage of first return above  | CC         |
