# Supplementary material for: Comparison of Errors Produced by ABA and ITC Methods for the Estimation of Forest Inventory Attributes at Stand and Tree Level in Pinus radiata Plantations in Chile
Source: MDPI journal article supplement (doi:10.3390/rs15061544), 2023-03-11
Supplement: s1 [file s1]

**Table S2. LiDAR survey Specifications**

| LiDAR Attributes           | Details                  |
|----------------------------|--------------------------|
| Scanner                    | ALS60 (Leica-Geosystems) |
| FOV max                    | 40°                      |
| Scan Frequency             | 100 Hz                   |
| Pulse rate                 | 158.2 kHz                |
| Side overlap               | >20%                     |
| Point density first return | 15 (12 – 20) points m-2  |
| Adquisition Data           | October 2016             |
