# Supplementary material for: Comparison of Errors Produced by ABA and ITC Methods for the Estimation of Forest Inventory Attributes at Stand and Tree Level in Pinus radiata Plantations in Chile
Source: MDPI journal article supplement (doi:10.3390/rs15061544), 2023-03-11
Supplement: s1 [file s1]

**Table S1. FieldMap® Specifications**

| Device                 | Use                | Accuracy |
|------------------------|--------------------|----------|
| Tablet rugged ARMOUR   | Data management    |          |
| Laser Ranger ForestPro | Real distance      | 0.01 m   |
|                        | Vertical angle     | 0.1 °    |
|                        | Diameter at height | 3 %      |
| MapStar compass        | Horizontal angle   | 0.03 °   |
| Electronic caliper     | Diameters          | 0.001 m  |
